# Supplementary material for: The emerging role of robotics in plastic and reconstructive surgery: a systematic review and meta-analysis
Source: PubMed Central journal article supplement (PMC11180031; doi:10.1007/s11701-024-01987-7), 2024-06-15
Supplement: 11701_2024_1987_MOESM3_ESM.pdf [file 11701_2024_1987_MOESM3_ESM.pdf]

|                         | Q1      | Q2      | Q3      | Q4      | Q5      | Q6  | Q7  | Q8  | Q9  | Q10     | Overall |
|-------------------------|---------|---------|---------|---------|---------|-----|-----|-----|-----|---------|---------|
| Almeida et al.          | Yes     | Yes     | Yes     | Yes     | Yes     | Yes | Yes | Yes | No  | Yes     | Include |
| Asaad et al.            | Yes     | Yes     | Unclear | Yes     | Yes     | Yes | Yes | Yes | No  | Unclear | Include |
| Aubrey et al.           | Yes     | Yes     | Yes     | Yes     | Yes     | Yes | Yes | Yes | No  | Yes     | Include |
| Beier et al.            | Yes     | Yes     | Yes     | Unclear | Unclear | Yes | Yes | Yes | No  | Yes     | Include |
| Besmens et al.          | No      | Unclear | Unclear | Unclear | Unclear | Yes | Yes | Yes | No  | N/A     | Include |
| Bishop et al.           | Yes     | Yes     | Unclear | Unclear | Unclear | No  | No  | No  | No  | Yes     | Include |
| Chan et al.             | Yes     | Yes     | Unclear | Unclear | Unclear | Yes | Yes | Yes | No  | Yes     | Include |
| Chen et al.             | Yes     | Yes     | Unclear | Yes     | Unclear | Yes | Yes | Yes | No  | Yes     | Include |
| Cheon et al.            | Yes     | Yes     | Yes     | Yes     | Yes     | Yes | Yes | Yes | No  | Yes     | Include |
| Chia et al.             | Yes     | No      | No      | No      | No      | No  | No  | Yes | No  | Yes     | Include |
| Choi et al.             | Yes     | Yes     | Unclear | Yes     | No      | No  | No  | No  | No  | Yes     | Include |
| Chung et al.            | Yes     | Yes     | Yes     | Yes     | Yes     | Yes | Yes | Yes | No  | Yes     | Include |
| Clemens et al.          | Yes     | Yes     | Yes     | Yes     | Yes     | Yes | Yes | Yes | No  | Yes     | Include |
| D'Andrea et al.         | Yes     | Yes     | Yes     | Yes     | Yes     | Yes | Yes | Yes | No  | Yes     | Include |
| Daar et al.             | Yes     | Yes     | Yes     | Yes     | Yes     | Yes | Yes | Yes | No  | Yes     | Include |
| Dabas et al.            | Yes     | Yes     | Yes     | Unclear | Yes     | Yes | Yes | Yes | No  | Yes     | Include |
| Doazan et al.           | Yes     | Yes     | Yes     | Yes     | Yes     | Yes | Yes | Yes | No  | Yes     | Include |
| Durmus et al. a         | Yes     | Yes     | Yes     | No      | Yes     | Yes | Yes | Yes | No  | Yes     | Include |
| Durmus et al. b         | Yes     | Yes     | Unclear | Unclear | Unclear | Yes | Yes | Yes | No  | Yes     | Include |
| Durmus et al. c         | Yes     | Yes     | Yes     | Yes     | Yes     | Yes | Yes | Yes | No  | Yes     | Include |
| Fouarge et al.          | Yes     | Yes     | Yes     | Yes     | Yes     | No  | No  | No  | No  | N/A     | Include |
| Frenkel et al.          | Yes     | Yes     | Yes     | Yes     | Yes     | Yes | Yes | Yes | Yes | Yes     | Include |
| Frey et al.             | Yes     | Yes     | Unclear | Yes     | Yes     | Yes | No  | No  | No  | N/A     | Include |
| Fujiwara et al.         | Yes     | Yes     | Yes     | Unclear | No      | Yes | Yes | Yes | No  | Yes     | Include |
| Gonzalez et al.         | Yes     | Yes     | Yes     | Yes     | Yes     | Yes | Yes | Yes | No  | Yes     | Include |
| Gorphe et al.           | Yes     | Yes     | Yes     | Yes     | Yes     | No  | Yes | Yes | No  | Yes     | Include |
| Hans et al.             | Yes     | Yes     | Yes     | Unclear | Yes     | Yes | Yes | Yes | No  | N/A     | Include |
| Haverland et al.        | Yes     | Yes     | Yes     | Yes     | Yes     | Yes | Yes | Yes | No  | Yes     | Include |
| He et al.               | Yes     | Yes     | Yes     | Unclear | Unclear | No  | No  | No  | No  | Yes     | Include |
| Houvenaeghal et al. a   | Yes     | Yes     | Yes     | Yes     | Yes     | No  | Yes | Yes | No  | Yes     | Include |
| Houvenaeghal et al. b   | Yes     | Yes     | Unclear | Unclear | Unclear | No  | Yes | Yes | No  | Yes     | Include |
| Jamshidian et al.       | Yes     | Yes     | Yes     | Yes     | Yes     | Yes | Yes | Yes | No  | Yes     | Include |
| Kim et al.              | Yes     | Yes     | Yes     | Unclear | Unclear | Yes | No  | Yes | No  | Yes     | Include |
| Kubik et al.            | Yes     | Yes     | Yes     | Yes     | Yes     | Yes | Yes | Yes | No  | Yes     | Include |
| Kuo et al.              | No      | Unclear | Unclear | Unclear | Unclear | Yes | Yes | Yes | No  | N/A     | Include |
| Lai et al. a            | Yes     | Yes     | Yes     | Yes     | Yes     | Yes | Yes | Yes | No  | Yes     | Include |
| Lai et al. b            | No      | Unclear | Unclear | Unclear | Unclear | No  | No  | No  | No  | N/A     | Include |
| Lai et al. c            | Yes     | Yes     | Yes     | Yes     | Yes     | No  | Yes | Yes | No  | Yes     | Include |
| Lai et al. d            | Yes     | Yes     | Yes     | Yes     | Yes     | Yes | Yes | Yes | No  | Yes     | Include |
| Lai et al. e            | Yes     | Yes     | Yes     | Yes     | Yes     | Yes | Yes | Yes | No  | Yes     | Include |
| Lallemant et al.        | Yes     | Yes     | Yes     | Yes     | Yes     | Yes | Yes | Yes | No  | Yes     | Include |
| Lindenblatt et al.      | Unclear | Unclear | Unclear | Unclear | Unclear | No  | Yes | Yes | No  | N/A     | Include |
| Mercante et al.         | Yes     | Yes     | Yes     | Yes     | Unclear | Yes | Yes | Yes | No  | Yes     | Include |
| Miyamoto et al.         | Unclear | Yes     | Unclear | Unclear | Unclear | No  | No  | Yes | No  | Yes     | Include |
| Mockelmann et al.       | Yes     | Yes     | Unclear | Unclear | Unclear | Yes | Yes | Yes | No  | Yes     | Include |
| Moon et al.             | Yes     | Yes     | Yes     | Yes     | Yes     | Yes | No  | Yes | No  | Yes     | Include |
| Muysoms et al.          | Yes     | Yes     | Yes     | Yes     | Yes     | Yes | Yes | Yes | No  | Yes     | Include |
| Patel et al.            | Yes     | Yes     | Yes     | Yes     | Yes     | Yes | Yes | Yes | No  | Yes     | Include |
| Pederson et al.         | No      | Yes     | Yes     | Unclear | Unclear | No  | No  | No  | No  | Yes     | Include |
| Rayman et al.           | Yes     | Yes     | Yes     | Yes     | Yes     | Yes | Yes | Yes | No  | Yes     | Include |
| Razafindranaly et al.   | Yes     | Yes     | Yes     | Yes     | Yes     | Yes | Yes | Yes | No  | Yes     | Include |
| Rubek et al.            | Yes     | Yes     | Yes     | Yes     | Yes     | Yes | Yes | Yes | No  | Yes     | Include |
| Safarti et al.          | Yes     | Yes     | Yes     | Yes     | Yes     | Yes | Yes | Yes | No  | Yes     | Include |
| Scott-Wittenborn et al. | Unclear | Unclear | Unclear | Unclear | Unclear | No  | No  | No  | No  | N/A     | Include |
| Sethia et al.           | Yes     | Yes     | Yes     | Unclear | Unclear | Yes | Yes | Yes | No  | Yes     | Include |
| Song et al. a           | No      | Yes     | Yes     | Unclear | Unclear | Yes | Yes | No  | No  | Yes     | Include |
| Song et al. b           | Yes     | Yes     | Unclear | Yes     | Yes     | Yes | Yes | Yes | No  | Yes     | Include |
| Toesca et al.           | Yes     | Yes     | Yes     | Yes     | Yes     | Yes | Yes | Yes | No  | Yes     | Include |
| Van Loon et al.         | Yes     | Yes     | Yes     | Yes     | Yes     | Yes | Yes | Yes | No  | Yes     | Include |
| Virgilio et al.         | Yes     | Yes     | Yes     | Yes     | Yes     | Yes | Yes | Yes | No  | Yes     | Include |
| Weinzierl et al.        | Unclear | Yes     | Unclear | Unclear | Unclear | Yes | Yes | No  | No  | Yes     | Include |
| Wittesaele et al.       | Yes     | Yes     | Yes     | Yes     | Yes     | Yes | Yes | Yes | No  | Yes     | Include |
